# 1        **Inter-individual genomic heterogeneity within European population isolates**

2

3        Paolo Anagnostou<sup>1,2</sup> ¶\*, Valentina Dominici<sup>1</sup> ¶, Cinzia Battaglia<sup>1</sup>, Stefania Sarno<sup>3</sup>, Alessio Boattini<sup>3</sup>, Carla  
4        Calò<sup>4</sup>, Paolo Francalacci<sup>4</sup>, Giuseppe Vona<sup>4</sup>, Sergio Tofanelli<sup>5</sup>, Miguel G. Vilar<sup>6</sup>, Vincenza Colonna<sup>7</sup>, Luca  
5        Pagani<sup>8,9</sup>, and Giovanni Destro Bisol<sup>1,2\*</sup>

6

7        <sup>1</sup> Dipartimento di Biologia Ambientale, Università di Roma “La Sapienza”, Piazzale Aldo Moro 5, Rome,  
8        00185, Italy

9        <sup>2</sup> Istituto Italiano di Antropologia, Piazzale Aldo Moro 5, Rome, 00185, Italy

10        <sup>3</sup> Dipartimento di Scienze Biologiche, Geologiche ed Ambientali, Università di Bologna, Via Selmi 3,  
11        Bologna, 40126, Italy

12        <sup>4</sup> Dipartimento di Scienze della Vita e dell’Ambiente, Università di Cagliari, SS 554, km 4.500, 09042  
13        Monserrato (Ca), Italy

14        <sup>5</sup> Dipartimento di Biologia, Università di Pisa, Via Ghini 13, Pisa, 56126, Italy

15        <sup>6</sup> National Geographic Society, 1145 17th Street NW, Washington DC 20036, USA

16        <sup>7</sup> Institute of Genetics and Biophysics “A. Buzzati-Traverso”, National Research Council (CNR), Via Pietro  
17        Castellino, 111, Naples, 80131, Italy.

18        <sup>8</sup> APE Lab, Department of Biology, University of Padova, Via U. Bassi, 58/B - 35121 Padova, Italy

19        <sup>9</sup> Estonian Biocentre, Institute of Genomics, University of Tartu, Riia 23b, 51010, Tartu, Estonia.

20

21        Corresponding authors

22        E-mail: [giovanni.destrobisol@uniroma1.it](mailto:giovanni.destrobisol@uniroma1.it)

23        E-mail: [paolo.anagnostou@uniroma1.it](mailto:paolo.anagnostou@uniroma1.it)

24

25        ¶ These authors contributed equally to this work

26

## 27 **Abstract**

28 A number of studies carried out since the early '70s has investigated the effects of isolation on genetic  
29 variation within and among human populations in diverse geographical contexts. However, no extensive  
30 analysis has been carried out on the heterogeneity among genomes within isolated populations. This issue  
31 is worth exploring since events of recent admixture and/or subdivision could potentially disrupt the  
32 genetic homogeneity which is to be expected when isolation is prolonged and constant over time. Here,  
33 we analyze literature data relative to 87,818 autosomal single-nucleotide polymorphisms, which were  
34 obtained from a total of 28 European populations. Our results challenge the traditional paradigm of  
35 population isolates as genetically (and genomically) uniform entities. In fact, focusing on the distribution  
36 of variance of intra-population diversity measures across individuals, we show that the inter-individual  
37 heterogeneity of isolated populations is at least comparable to the open ones. More in particular, three  
38 small and highly inbred isolates (Sappada, Sauris and Timau in Northeastern Italy) were found to be  
39 characterized by levels of this parameter largely exceeding that of all other populations, possibly due to  
40 relatively recent events of genetic introgression. Finally, we propose a way to monitor the effects of inter-  
41 individual heterogeneity in disease-gene association studies.

42

## 43 **Introduction**

44 Studying groups subject to barriers to gene flow provides a unique opportunity to understand how  
45 inbreeding and drift have shaped the structure of human genetic diversity. A very large number of  
46 investigations carried out since early '70s has examined the effects of isolation on intra- and inter-  
47 population variation in diverse geographical contexts, using genetic polymorphisms varying in mode of  
48 inheritance and evolutionary rate [e.g. 1–5]. Currently, the consequences of isolation may be better  
49 studied using genome wide approaches (GWAs), such as those based on single-nucleotide polymorphism  
50 (SNP) microarrays, which enable the simultaneous analysis of markers distributed across the human

51 chromosomes. Compared to unilinearly transmitted polymorphisms of mitochondrial DNA and Y  
52 chromosome or to small panels of autosomal loci, GWA approaches make it possible to detect the imprints  
53 of isolation left on genomic makeup not only by mutation, but also by recombination [6–14].

54 In a previous study, we have compared intra and inter-population measures of genomic variation in a  
55 large sampling of European populations in order to understand to what extent the discrete open and  
56 isolated dichotomous categories correspond to the way in which their genomic diversity is structured [15].

57 Here, we move our focus to the heterogeneity among genomes within populations. Our results shed light  
58 on not yet understood aspects of the genomic structure of population isolates, which may also have  
59 significant implications for their use in disease-gene association studies.

60 In this study, we focus on the variance of intra-population variation measures in a large sampling of  
61 European populations using 87,818 autosomal SNP data. Our results highlight the existence of different  
62 and partly unexpected patterns, whose implications for our current view of the genetic structure of  
63 population isolates and disease-gene association studies are discussed.

64

## 65 **Materials and methods**

### 66 **Dataset**

67 We assembled a total of 87,818 autosomal SNPs, included in the GenoChip 2.0 array [16], in 610 healthy  
68 unrelated adult individuals from 28 European populations (Table 1). Our dataset comprises nine  
69 populations with clear signatures of genetic isolation evaluated using both unilinear and autosomal  
70 polymorphisms [15,17,18] plus nineteen open populations which were chosen using the following three  
71 criteria: (i) geographic proximity with the isolated populations; (ii) geographic coverage of the European  
72 continent; (iii) sample size of at least 10 individuals. Compared to the dataset used by Anagnostou et al.  
73 [15], we included five open populations (Belarus, Hungary, Lithuania, Romania and Ukraine) and removed  
74 the Cimbrians since it lacked consistent signatures of genetic isolation. Despite its limits [15], we maintain

75 here the dichotomy between open and isolated population for practical reasons (see also the Discussion  
76 section).

77

78 **Table 1. Demographic information about the populations under study.**

79

| POPULATION                            | LABEL | N  | CURRENT CENSUS | TIME SINCE ISOLATION (in years before present) | ISOLATION FACTOR | REFERENCE |
|---------------------------------------|-------|----|----------------|------------------------------------------------|------------------|-----------|
| <b>North Eastern Italian isolates</b> |       |    |                |                                                |                  |           |
| Sappada                               | SAP   | 24 | 1,307*         | ~1000                                          | G/L              | [15]      |
| Sauris                                | SAU   | 10 | 429*           | ~800                                           | G/L              | [15]      |
| Timau                                 | TIM   | 24 | 500*           | 800-1000                                       | G/L              | [15]      |
| <b>Sardinians isolates</b>            |       |    |                |                                                |                  |           |
| Benetutti                             | BEN   | 25 | 1,971*         | ~5000                                          | G/L              | [15]      |
| Carloforte                            | CFT   | 25 | 6,301*         | 268                                            | G/L              | [15]      |
| North Sardinia                        | NSA   | 25 | 96,448*        | 3900-2900                                      | G/L              | [15]      |
| Sulcis Iglesiente                     | SGL   | 23 | 128,540*       | 2800                                           | G/L              | [15]      |
| <b>European isolates</b>              |       |    |                |                                                |                  |           |
| Orkney                                | ORK   | 15 | 21,349*        | ~1300                                          | G                | [19]      |
| French Basques                        | BAS   | 24 | ~650,000**     | 5500-3500                                      | G/L              | [19]      |
| <b>South Europe</b>                   |       |    |                |                                                |                  |           |
| Albania (Gheg)                        | ALB   | 24 | 2,831,741*     | -                                              | -                | [20]      |
| Croatia                               | CRO   | 20 | 4,284,889*     | -                                              | -                | [21]      |
| Greece                                | GRE   | 20 | 10,815,197*    | -                                              | -                | [22]      |
| Spain                                 | SPA   | 34 | 46,815,916*    | -                                              | -                | [22]      |
| <b>East Europe</b>                    |       |    |                |                                                |                  |           |
| Belorussia                            | BEL   | 17 | 9,498,700*     | -                                              | -                | [21]      |
| Bulgaria                              | BUL   | 31 | 7,202,198*     | -                                              | -                | [22]      |
| Hungary                               | HUN   | 19 | 9,830,485*     | -                                              | -                | [21]      |
| Lithuania                             | LIT   | 10 | 2,842,412*     | -                                              | -                | [21]      |
| Poland                                | POL   | 32 | 38,511,824*    | -                                              | -                | [22]      |
| Romania                               | ROM   | 16 | 19,511,000*    | -                                              | -                | [21]      |
| Russia                                | RUS   | 25 | 144,192,450*   | -                                              | -                | [19]      |
| Ukraine                               | UKR   | 20 | 42,539,010*    | -                                              | -                | [23]      |
| <b>North Europe</b>                   |       |    |                |                                                |                  |           |
| Norway                                | NOR   | 18 | 5,214,890*     | -                                              | -                | [22]      |
| British isles                         | GBR   | 16 | 63,181,775*    | -                                              | -                | [22]      |
| <b>West Europe</b>                    |       |    |                |                                                |                  |           |
| France                                | FRA   | 28 | 67,264,000*    | -                                              | -                | [19]      |

| Italy                                                                                                                                                                                                                        |     |    |             |   |   |                                      |
|------------------------------------------------------------------------------------------------------------------------------------------------------------------------------------------------------------------------------|-----|----|-------------|---|---|--------------------------------------|
| North Italy (Aosta)                                                                                                                                                                                                          | NIT | 22 | 34,619*     | - | - | [15]                                 |
| Central Italy (Piana di Lucca)                                                                                                                                                                                               | CIT | 25 | 394,318*    | - | - | Tofanelli S., personal communication |
| South Italy                                                                                                                                                                                                                  | SIT | 18 | 14,184,916* | - | - | [22]                                 |
| Sicily                                                                                                                                                                                                                       | SIC | 20 | 5,077,487*  | - | - | [22]                                 |
| * National population and housing census - 2011 (ALB, BEN, CIT, CFT, CRO, CVV, GBR, GRE, NIT, NSA, ORK, POL, SAP, SAU, SGL, SIC, SIT, SPA, TIM) – 2014 (BUL) – 2015 (ROM, RUS, NOR) – 2016 (BEL, FRA, HUN, UKR) - 2017 (LIT) |     |    |             |   |   |                                      |
| ** EuskoJauraritza 2008                                                                                                                                                                                                      |     |    |             |   |   |                                      |
| ***Human Genome DIVERSITY Panel, HYPERLINK " <a href="http://shgc.stanford.edu/hgdp">http://shgc.stanford.edu/hgdp</a> "                                                                                                     |     |    |             |   |   |                                      |

80

## 81 Data analyses

82 The samples genotyped with the GenoChip 2.0 array were merged with literature data and then filtered  
83 according to the standard genotype quality control metrics using PLINK (i) SNP genotyping success rate >  
84 90%; (ii) individuals with a genotyping success rate > 92%; (iii) absence of relatedness to the 3rd  
85 generation (Identity by Descent, IBD > 0.185). Concerning the latter analysis, when a related pair of  
86 individuals was detected, only one sample was randomly chosen and used for the subsequent analysis

87 The PLINK package version 1.9 was used to calculate observed homozygosity (HOM), Identity-by-State  
88 (IBS) values, and number (ROH\_NSEG) and length (ROH\_KB) of Runs of Homozygosity (RoHs). The average  
89 HOM per population was estimated using the "--hardy" option. We used the "--distance ibs" option to  
90 calculate pairwise intra-population IBS values and calculated the median for each individual's distribution.

91 The "--homozyg" option was used for RoHs which were identified using the default setting (sliding window  
92 of 5 Mb, minimum of 50 SNPs, one heterozygous genotype and five missing calls allowed). In order to  
93 ensure that these were true RoHs, we set a minimum-length cut-off of 500 kb and 14 homozygous SNPs  
94 [11].

95 We used SHAPEIT v2.r790 [24] to phase the data, using the 1000 Genomes dataset as a reference panel.

96 We split our dataset by chromosome and phased all individuals simultaneously and used the most likely

97 pairs of haplotypes (using the `-output-max` option) for each individual for downstream applications. For  
98 the phasing and conversion, we used genetic map build 37 downloaded with SHAPEIT. We painted each  
99 individual using every other individuals of the same population as a donor [25]. We first inferred the global  
100 mutation probability and the switch rate for chromosomes 1, 5, 8, 12, 17 and 22 in 10 iterations of the EM  
101 (expectation maximization) algorithm. We fixed the parameters estimated from this analysis ( $N_e$ , `-n` flag,  
102 and  $\theta$ , `-M` flag) to infer the ChromoPainter coancestry matrix for each chromosome. Using  
103 ChromoCombine, we combined the data into a single final coancestry matrix. The haplotype chunks and  
104 their total length were estimated using as recipients and donors the individuals of the same population  
105 (CHR\_P).

106 The comparison of inter-individual heterogeneity for measures of intra-population variation as well as  
107 CHR\_P was estimated through the equality of variances (Brown-Forsythe Levene type procedure), after  
108 the application of Bonferroni correction (R package `lawstat`).

109 Maximum likelihood estimates of individual ancestries were obtained using ADMIXTURE v1.23 under  
110 default values. Its algorithm is relatively robust to SNP ascertainment bias [26] since it assigns individual  
111 ancestry to a finite number of population clusters, and uses a large multilocus dataset, while the most  
112 informative SNPs for ancestry inference are variants with large frequency differences across populations  
113 [27]. We applied unsupervised clustering analysis to the whole sample set, exploring the hypothesis of  
114  $K=2$  to 15 clusters. Five independent replicates were run and aligned with CLUMPP. Best  $K$  was estimated  
115 by the cross-error estimation implemented in ADMIXTURE. We calculated individual heterogeneity  
116 (ADX\_HET) as the squared difference between each ancestry proportion and its population mean,  
117 averaged over all possible ancestries. Population heterogeneity was obtained as the median of individual  
118 values.

119 Admixture dates were inferred using the number of ancestry switches and ancestry proportions following  
120 Johnson et al [28]. The whole procedure was as follows: we first jointly phased the 87,818 using the

121 Shapelt [24] software and the 1000 Genomes data as a reference panel. Phased chromosomes were then  
122 used to run the RFMix algorithm [29] with the PopPhased option and default parameters. This modelling  
123 approach identifies the ancestry of discrete genomic segments of arbitrary size using a conditional random  
124 field parameterized by random forests trained on a reference population panel. Finally, the output of  
125 RFmix was employed to calculate both the number of ancestry switches and ancestry proportions for each  
126 target individual.

127

## 128 Results

129 As a first step, we assessed the genomic heterogeneity occurring among individuals within populations  
130 using first four intra-population measures of genomic diversity, based either on single nucleotide (HOM,  
131 IBS) or haplotype variation (RoH-KB, RoH-NSEG), for which intra-population variance can be calculated. As  
132 a whole, isolated populations showed higher heterogeneity values than the open ones (Fig. 1), with  
133 statistically significant differences for two out of four parameters (KB and NSEG; Mann-Whitney test p-  
134 value < 0.05). Looking at single populations, the most inbred ones - Sauris, Sappada and Timau - were  
135 found to be among the most diverse for all measures along with North Sardinians.

136

137 **Fig. 1. Distribution of inter-individual heterogeneity values across populations and Mann-Whitney U**

138 **test.** Comparison between isolated (red) and open (blue) populations for homozygosity (A), median  
139 values of intra-population IBS (B), number of RoHs (C) and total length of RoHs (D).

140

141 Then, we compared heterogeneity for ancestry proportions (ADX\_HET). Also, in this case, isolates, as a  
142 whole, were found to be more heterogeneous than open populations (1.38E-03 vs 6.44E-04), but the  
143 difference was statistically insignificant (Mann-U-Whitney p-value > 0.05). The greatest values were again  
144 obtained in the three population isolates from the eastern Italian Alps, followed by North Sardinians (Figs

145 2A and 2B), with a noticeable difference: the heterogeneity was more evenly distributed across individuals  
146 of the former populations, as indicated by their ratios between average and median values for the best  
147 supported K value (K=4; S1 Tabòe). Interestingly, we detected a highly prevalent village-specific  
148 component in 50% of the genomes from Sappada (12 out of 24, at K=4) and in 54% of those from Timau  
149 (13 out of 24 at K=5, S1 Fig.). The remaining genomes were clearly more heterogeneous, a likely signature  
150 of recent admixture.

151

152 **Fig. 2. Inter-individual heterogeneity of ancestry components and intra-population haplotype sharing.**

153 (A) Maximum likelihood estimates of individual ancestries (K=4) for the 28 populations under study; (B)  
154 intra-population distribution of the admixture heterogeneity measure (y axis log scale); (C) Inter-  
155 individual heterogeneities of the total length of chunks among individuals in each population (y axis log  
156 scale; see materials and methods for more detail).

157

158 Finally, we took into account the heterogeneity of the total length of haplotype chunks shared between  
159 individuals (CHR\_P). The distribution of this parameter reconfirmed the patterns observed for groups  
160 (higher values in isolates than open; Mann-Whitney U test based on median variance values, p-  
161 value=0.0029) and single populations (higher values in Sauris, Sappada and Timau). As the only peculiarity,  
162 a noticeable signal was provided also from the Orkney islanders (Fig. 2C).

163 In order to understand if the results obtained for the three north eastern Italian isolates might be due to  
164 introgression of exogenous genetic components, Sappada and Timau samples were splitted into two sub-  
165 groups on the basis of ADMIXTURE ancestry proportions (at K=4 and K=5 for Sappada and Timau,  
166 respectively). In the case of Sauris, sub-groups would had been too small to be separately analyzed.  
167 Individuals with a highly prevalent village-specific ancestry (threshold 99%; sub-groups SAP\_VSA and  
168 TIM\_VSA) were taken separate from those with more heterogeneous ancestry, who were termed as



169 SAP\_HTA and TIM\_HTA. Thereafter, we performed the Levene's tests for equality of variances between  
170 all populations (27 comparisons for all combinations population/measure). Only comparisons with a ratio  
171 between standard deviations  $>1$  and significant after Bonferroni correction are shown in Fig. 3. The  
172 highest number of overall significant comparisons was found for Sauris, which was also the only  
173 population with hits in all measures, while the high values of inter-individual heterogeneity for the other  
174 north-eastern Italian isolates were not captured by HOM. A relatively high number of significant  
175 comparisons still persisted in the HTA groups of both Sappada and Timau, mainly due to KB and CHR\_P,  
176 respectively. Signatures of inter-individual heterogeneity were recorded also in VSA sub-groups, more  
177 evidently in Timau where significant comparisons were observed not only for CHR\_P (like in Sappada) but  
178 also for KB.

179

180 **Fig. 3. Pairwise comparisons of inter-individual heterogeneity.** Number of statistically significant  
181 pairwise comparisons with a ratio between standard deviations  $>1$  after Bonferroni correction. For the  
182 measures based on pairwise comparisons (IBS and CHR\_P), population variance was calculated using the  
183 individual median values. Comparisons between Sappada and Timau and their sub-groups (SAP\_VSA,  
184 SAP\_HTA, TIM\_VSA and TIM\_HTA) were not included.

185

186 Given the support received by genetic introgression in generating the observed pattern from the analyses  
187 described above, we went to infer the time frames of the admixture which likely occurred between  
188 SAP\_HTA and TIM\_HTA sub-groups and geographically-close Italian speaking populations. We  
189 preliminarily tested the reliability of our estimates panel using genomic profiles of African-Americans  
190 obtained with a much denser SNP set. To this purpose, we retrieved data from the 1000 genomes project  
191 phase 3 and used a simple three population model with 30 randomly chosen individuals from the African-  
192 American population (ASW) as targets and an equal number of individuals of European (CEU) and African

193 (YRI) origin as sources. Estimates obtained by using our SNP panel and another including 8,142,382  
194 markers (with MAF<0.05) were close each other and consistent with previous results based on molecular  
195 data [30]: the admixture event dated at around six generations ago, with an average value across  
196 individuals of 6.9+/-3.7 and 6.2+/-2.8 for the high- and low-density SNP sets, respectively (see S2 Table  
197 for individual estimates). Then, we applied the same procedure to the admixed sub-groups (SAP\_HTA and  
198 TIM\_HTA) as targets, while the un-admixed ones (SAP\_VSA and TIM\_VSA) and the northern Italians (NIT)  
199 served as sources. The resulting admixture dates were relatively recent, but consistent with the  
200 grandfather rule: from 3.8 to 5.5 generations (average = 4.6) in Sappada and from 3.8 to 4.8 in Timau  
201 (average = 4.4) (see S3 and S4 Tables for individual results). As a matter of fact, our sample selection  
202 criteria proved effective in avoiding sampling of recently admixed individuals, thereby allowing us to draw  
203 a picture of the genomic structure preceding the isolation breakdown, an event occurred in the eastern  
204 Alps region between the two world wars [31,32].

## 205 **Discussion**

206 Previous GWA studies, which analyzed genetic variation of isolated human populations, focused on  
207 measures which summarize single nucleotide and haplotype variation within or among groups [e.g.  
208 11,33,34]. A previous study led by one of us (V.C.) provided evidence of structure within an isolated  
209 population (Cardile, southern Italy [35]), but no comparison with other isolates and open populations was  
210 carried out. The possible presence of structure within population isolates is worth exploring in depth since  
211 it could be a signature of events of recent admixture and/or subdivision; both could potentially disrupt  
212 the homogeneity due to the founder effect and persistence of inbreeding over generations.

213 To gain new insights into the genomic structure of isolated populations, we decided to focus on the  
214 distribution of variance (heterogeneity) of intra-population diversity measures across individuals within  
215 populations, rather than relying on their average values. In contrast with their common view as groups  
216 of genetically homogeneous individuals, we observed that the inter-individual genomic heterogeneity of

217 isolated populations is at least comparable to that of the open ones. It is worth reminding that applying  
218 standard measures of intra-population diversity to our dataset produced the expected pattern, with  
219 isolates characterized by higher homozygosity, longer and more numerous ROHs and higher IBS values  
220 than open populations, although a clear discontinuity of values between the two groups is not noticeable  
221 (see [15])

222 Interestingly, three small and highly inbred isolates (Sappada, Sauris and Timau) were characterized by  
223 particularly high heterogeneity values, which largely exceeded those calculated in all other populations.  
224 Given that there is no evidence to support the presence of sub-groups with distinct matrimonial  
225 behaviours for any of them, this finding could hardly be put down to population subdivision. However,  
226 the observed patterns could be explained, at least in part, by relatively recent events of genetic  
227 introgression, such as those suggested by our admixture dates based on ancestry switches. In fact, after  
228 removing the individuals with higher percentages of mixed ancestries from the Sappada and Timau  
229 samplings, their number of statistically significant pairwise comparisons for inter-individual heterogeneity  
230 diminished substantially (Fig. 3). We reason that exogenous components might have survived more easily  
231 in the three isolates from northeastern Italy than in other populations for two reasons. Firstly, when most,  
232 if not all, matrimonial unions occur within small and highly inbred isolates, as is the case for the three  
233 populations cited above, carriers of new genetic components may have a greater chance of contributing  
234 to the gene pool. In line with this idea, in our global dataset, a high and significant positive correlation was  
235 observed between inbreeding rates (S5 Table) and Admixture inter-individual heterogeneity values  
236 (Pearson correlation coefficient: 0.768; p-value<0.001). Secondly, the ratio between sample and census  
237 size for Sauris, Sappada and Timau (from 1.8% to 4.8%) is greater than in other isolates (from 1.3% to <  
238 0.1%), which increases the probability of sampling individuals bearing genetic components occurring at  
239 low or moderate frequencies.

240 A retrospective look at previous studies shows that other small-sized European isolates with a very high  
241 ratio between sample and census size, namely Clauzetto, Erto, Illeggio, Resia and (another sampling from)  
242 Sauris, show a similar pattern to what we observed [34]. A high level of heterogeneity among individuals  
243 was in fact evidenced by their ancestry proportions and by the results of different types of principal  
244 component analyses (basic, spatial and discriminant). The results obtained were explained by Esko et al.  
245 [34] as a signature of population sub-structure. Unfortunately, the data this research work was based on  
246 were not released by the authors and, therefore, it was not possible to re-analyze and compare them with  
247 our results.

248 Whatever the cause of this high genomic inter-individual heterogeneity we observed in Sappada, Sauris  
249 and Timau, we cannot ignore the question: “what do our results imply for the way in which bio-medical  
250 studies are carried out in population isolates?”. Although, the most robust evidence was noticed in some  
251 young and small-sized population isolates - which are less used in association studies than the older and  
252 larger ones [36] - our results are worthy of attention since they highlight a confounding factor which has  
253 not been yet adequately taken into account. In fact, to the best of our knowledge, the effect of increased  
254 allelic and haplotypic heterogeneity has been investigated only in relation to the issue of undetected  
255 population structure in large scale association studies [37], whereas we argue that it may represent a  
256 drawback also for genetic investigations of population isolates.

257 We suggest that genetic clustering algorithms may be used to test for the presence of individuals with  
258 different ancestry proportions within isolated populations, similarly to what has been previously done by  
259 Esko et al. [29] (see also [38]). Whenever genomes with substantially more heterogeneous ancestry are  
260 detected, it would be worth removing them, re-estimating the parameters of gene-disease association  
261 and comparing the new results with those obtained using the whole sample. This could help evaluate  
262 whether the genomes with mixed ancestry - in which the reduction of the haplotypic and allelic diversity  
263 produced by the effects of the founders and inbreeding should be less detectable - may have acted as

264 confounding factors. For each dataset, different ancestry proportions could be tried as thresholds, and  
265 the one able to reduce inter-individual heterogeneity without leading to a significant loss of power should  
266 be used.

267

## 268 **Conclusions**

269 In this study we have shed light on the occurrence of relatively high levels of inter-individual heterogeneity  
270 in population isolates and proposed a way to monitor their effects on the inferences of association  
271 between genes and diseases. This research work challenges the traditional paradigm which considers  
272 population isolates as genetically uniform entities, providing evidence of their emerging complexity. We  
273 hope that our study can stimulate further investigations based on a wider variety of samples and more  
274 powerful genomic tools, through which a better understanding of the fine-grained genomic structure of  
275 human population isolates will finally be reached.

276

## 277 **Acknowledgments**

278 We are greatly indebted to all the blood donors. We would also like to thank Marcella Benedetti  
279 (Municipality of Sappada), Nino Pacilè and Lucia Protto (Municipality of Sauris), Vito Massalongo (Giazza),  
280 Ottaviano Matiz and Velia Plozner (Timau) for their valuable assistance in the sample collection and for  
281 their warm hospitality.

282

## 283 **References**

- 284 1. Ward RH, Neel JV. Gene frequencies and microdifferentiation among the Makiritare Indians. IV. A  
285 comparison of a genetic network with ethnohistory and migration matrices; a new index of genetic  
286 isolation. *Am J Hum Genet.* 1970;22: 538–561. Available:  
287 <https://www.ncbi.nlm.nih.gov/pubmed/5516237>

- 288 2. Arcos-Burgos M, Muenke M. Genetics of population isolates. *Clin Genet*. 2002;61: 233–247.  
289 doi:10.1034/j.1399-0004.2002.610401.x
- 290 3. Colonna V, Nutile T, Astore M, Guardiola O, Antoniol G, Ciullo M, et al. Campora: a young genetic  
291 isolate in South Italy. *Hum Hered*. 2007;64: 123–135. doi:10.1159/000101964
- 292 4. Charlesworth B. Fundamental concepts in genetics: effective population size and patterns of  
293 molecular evolution and variation. *Nat Rev Genet*. 2009;10: 195–205. doi:10.1038/nrg2526
- 294 5. Palin K, Campbell H, Wright AF, Wilson JF, Durbin R. Identity-by-descent-based phasing and  
295 imputation in founder populations using graphical models. *Genet Epidemiol*. 2011;35: 853–860.  
296 doi:10.1002/gepi.20635
- 297 6. de la Chapelle A, Wright FA. Linkage disequilibrium mapping in isolated populations: The example  
298 of Finland revisited. *Proceedings of the National Academy of Sciences*. 1998;95: 12416–12423.  
299 doi:10.1073/pnas.95.21.12416
- 300 7. Jorde LB, Watkins WS, Kere J, Nyman D, Eriksson AW. Gene mapping in isolated populations: new  
301 roles for old friends? *Hum Hered*. 2000;50: 57–65. doi:10.1159/000022891
- 302 8. Varilo T, Laan M, Hovatta I, Wiebe V, Terwilliger JD, Peltonen L. Linkage disequilibrium in isolated  
303 populations: Finland and a young sub-population of Kuusamo. *Eur J Hum Genet*. 2000;8: 604–612.  
304 doi:10.1038/sj.ejhg.5200482
- 305 9. Service S, DeYoung J, Karayiorgou M, Roos JL, Pretorius H, Bedoya G, et al. Magnitude and  
306 distribution of linkage disequilibrium in population isolates and implications for genome-wide  
307 association studies. *Nat Genet*. 2006;38: 556–560. doi:10.1038/ng1770
- 308 10. Kristiansson K, Naukkarinen J, Peltonen L. Isolated populations and complex disease gene  
309 identification. *Genome Biol*. 2008;9: 109. doi:10.1186/gb-2008-9-8-109

- 310 11. Colonna V, Pistis G, Bomba L, Mona S, Matullo G, Boano R, et al. Small effective population size and  
311 genetic homogeneity in the Val Borbera isolate. *Eur J Hum Genet.* 2013;21: 89–94.  
312 doi:10.1038/ejhg.2012.113
- 313 12. Hatzikotoulas K, Gilly A, Zeggini E. Using population isolates in genetic association studies. *Brief*  
314 *Funct Genomics.* 2014;13: 371–377. doi:10.1093/bfgp/elu022
- 315 13. Panoutsopoulou K, Hatzikotoulas K, Xifara DK, Colonna V, Farmaki A-E, Ritchie GRS, et al. Genetic  
316 characterization of Greek population isolates reveals strong genetic drift at missense and trait-  
317 associated variants. *Nat Commun.* 2014;5: 5345. doi:10.1038/ncomms6345
- 318 14. Xue Y, Mezzavilla M, Haber M, McCarthy S, Chen Y, Narasimhan V, et al. Enrichment of low-  
319 frequency functional variants revealed by whole-genome sequencing of multiple isolated European  
320 populations. *Nat Commun.* 2017;8: 15927. doi:10.1038/ncomms15927
- 321 15. Anagnostou P, Dominici V, Battaglia C, Pagani L, Vilar M, Wells RS, et al. Overcoming the dichotomy  
322 between open and isolated populations using genomic data from a large European dataset. *Sci Rep.*  
323 2017;7: 41614. doi:10.1038/srep41614
- 324 16. Elhaik E, Greenspan E, Staats S, Krahn T, Tyler-Smith C, Xue Y, et al. The GenoChip: a new tool for  
325 genetic anthropology. *Genome Biol Evol.* 2013;5: 1021–1031. doi:10.1093/gbe/evt066
- 326 17. Capocasa M, Anagnostou P, Bachis V, Battaglia C, Bertoncini S, Biondi G, et al. Linguistic,  
327 geographic and genetic isolation: a collaborative study of Italian populations. *J Anthropol Sci.*  
328 2014;92: 201–231. doi:10.4436/JASS.92001
- 329 18. Anagnostou P, Capocasa M, Dominici V, Montinaro F, Coia V, Destro-Bisol G. Evaluating mtDNA  
330 patterns of genetic isolation using a re-sampling procedure: A case study on Italian populations.  
331 *Ann Hum Biol.* 2017;44: 140–148. doi:10.1080/03014460.2016.1181784
- 332 19. Human Genome Diversity Project (HGDP). *Encyclopedia of Genetics, Genomics, Proteomics and*  
333 *Informatics.* 2008. pp. 923–923. doi:10.1007/978-1-4020-6754-9\_7923

- 334 20. Sarno S, Boattini A, Pagani L, Sazzini M, De Fanti S, Quagliariello A, et al. Ancient and recent  
335 admixture layers in Sicily and Southern Italy trace multiple migration routes along the  
336 Mediterranean. *Sci Rep.* 2017;7: 1984. doi:10.1038/s41598-017-01802-4
- 337 21. Behar DM, Yunusbayev B, Metspalu M, Metspalu E, Rosset S, Parik J, et al. The genome-wide  
338 structure of the Jewish people. *Nature.* 2010;466: 238–242. doi:10.1038/nature09103
- 339 22. Hellenthal G, Busby GBJ, Band G, Wilson JF, Capelli C, Falush D, et al. A genetic atlas of human  
340 admixture history. *Science.* 2014;343: 747–751. doi:10.1126/science.1243518
- 341 23. Yunusbayev B, Metspalu M, Järve M, Kutuev I, Rootsi S, Metspalu E, et al. The Caucasus as an  
342 asymmetric semipermeable barrier to ancient human migrations. *Mol Biol Evol.* 2012;29: 359–365.  
343 doi:10.1093/molbev/msr221
- 344 24. O’Connell J, Gurdasani D, Delaneau O, Pirastu N, Ulivi S, Cocca M, et al. A general approach for  
345 haplotype phasing across the full spectrum of relatedness. *PLoS Genet.* 2014;10: e1004234.  
346 doi:10.1371/journal.pgen.1004234
- 347 25. Lawson DJ, Hellenthal G, Myers S, Falush D. Inference of population structure using dense  
348 haplotype data. *PLoS Genet.* 2012;8: e1002453. doi:10.1371/journal.pgen.1002453
- 349 26. Haasl RJ, Payseur BA. Multi-locus inference of population structure: a comparison between single  
350 nucleotide polymorphisms and microsatellites. *Heredity.* 2011;106: 158–171.  
351 doi:10.1038/hdy.2010.21
- 352 27. Rosenberg NA, Li LM, Ward R, Pritchard JK. Informativeness of genetic markers for inference of  
353 ancestry. *Am J Hum Genet.* 2003;73: 1402–1422. doi:10.1086/380416
- 354 28. Johnson NA, Coram MA, Shriver MD, Romieu I, Barsh GS, London SJ, et al. Ancestral Components of  
355 Admixed Genomes in a Mexican Cohort. *PLoS Genet.* 2011;7: e1002410.  
356 doi:10.1371/journal.pgen.1002410



- 357 29. Maples BK, Gravel S, Kenny EE, Bustamante CD. RFMix: a discriminative modeling approach for  
358 rapid and robust local-ancestry inference. *Am J Hum Genet.* 2013;93: 278–288.  
359 doi:10.1016/j.ajhg.2013.06.020
- 360 30. Moorjani P, Patterson N, Hirschhorn JN, Keinan A, Hao L, Atzmon G, et al. The history of African  
361 gene flow into Southern Europeans, Levantines, and Jews. *PLoS Genet.* 2011;7: e1001373.  
362 doi:10.1371/journal.pgen.1001373
- 363 31. Vogel F. Break-up of isolates. In: Roberts DF, Fujiki N, Torizuka K, Roberts DF, Fujiki N, Torizuka K,  
364 editors. *Isolation, Migration and Health.* Cambridge: Cambridge University Press; 1992. pp. 41–54.  
365 doi:10.1017/CBO9780511983634.006
- 366 32. Viazzo PP. Transizioni alla modernità in area alpina. Dicotomie, paradossi, questioni aperte. *Histoire*  
367 *des Alpes – Storia delle Alpi – Geschichte der Alpen* 2007;12: 13-28.
- 368 33. Karafet TM, Bulayeva KB, Bulayev OA, Gurganova F, Omarova J, Yepiskoposyan L, et al. Extensive  
369 genome-wide autozygosity in the population isolates of Daghestan. *Eur J Hum Genet.* 2015;23:  
370 1405–1412. doi:10.1038/ejhg.2014.299
- 371 34. Esko T, Mezzavilla M, Nelis M, Borel C, Debniak T, Jakkula E, et al. Genetic characterization of  
372 northeastern Italian population isolates in the context of broader European genetic diversity. *Eur J*  
373 *Hum Genet.* 2013;21: 659–665. doi:10.1038/ejhg.2012.229
- 374 35. Colonna V, Nutile T, Ferrucci RR, Fardella G, Aversano M, Barbujani G, et al. Comparing population  
375 structure as inferred from genealogical versus genetic information. *Eur J Hum Genet.* 2009;17:  
376 1635–1641. doi:10.1038/ejhg.2009.97
- 377 36. Heutink P, Oostra BA. Gene finding in genetically isolated populations. *Hum Mol Genet.* 2002;11:  
378 2507–2515. Available: <https://www.ncbi.nlm.nih.gov/pubmed/12351587>
- 379 37. Marchini J, Cardon LR, Phillips MS, Donnelly P. The effects of human population structure on large  
380 genetic association studies. *Nat Genet.* 2004;36: 512–517. doi:10.1038/ng1337

381 38. Rosenberg NA, Pritchard JK, Weber JL, Cann HM, Kidd KK, Zhivotovsky LA, et al. Genetic structure of  
382 human populations. *Science*. 2002;298: 2381–2385. doi:10.1126/science.1078311

383

## 384 **Supporting information**

385 **S1 Table. Ratio between mean and median inter-individual heterogeneity.** Analysis based on the Admixture  
386 components proportion recorded at K=4.

387

388 **S2 Table. Date estimates based on ancestry switches inferred with the high- and low-density SNP sets for the**  
389 **1000 Genomes African Americans.**

390 **S3 Table. Ancestry proportions, number of ancestry switches and date estimates for the Sappada admixed**  
391 **subgroup.**

392 **S4 Table. Ancestry proportions, number of ancestry switches and date estimates for the Timau admixed**  
393 **subgroup.**

394

395 **S5 Table. Inbreeding coefficient values.** Calculated as the proportion of the autosomal genome in runs of  
396 homozygosity, excluding the centromeres.

397 **S1 Fig. Maximum likelihood estimates of individual ancestries.** Plots from K=2 to K=10 for the 28 populations  
398 under study.

399

A

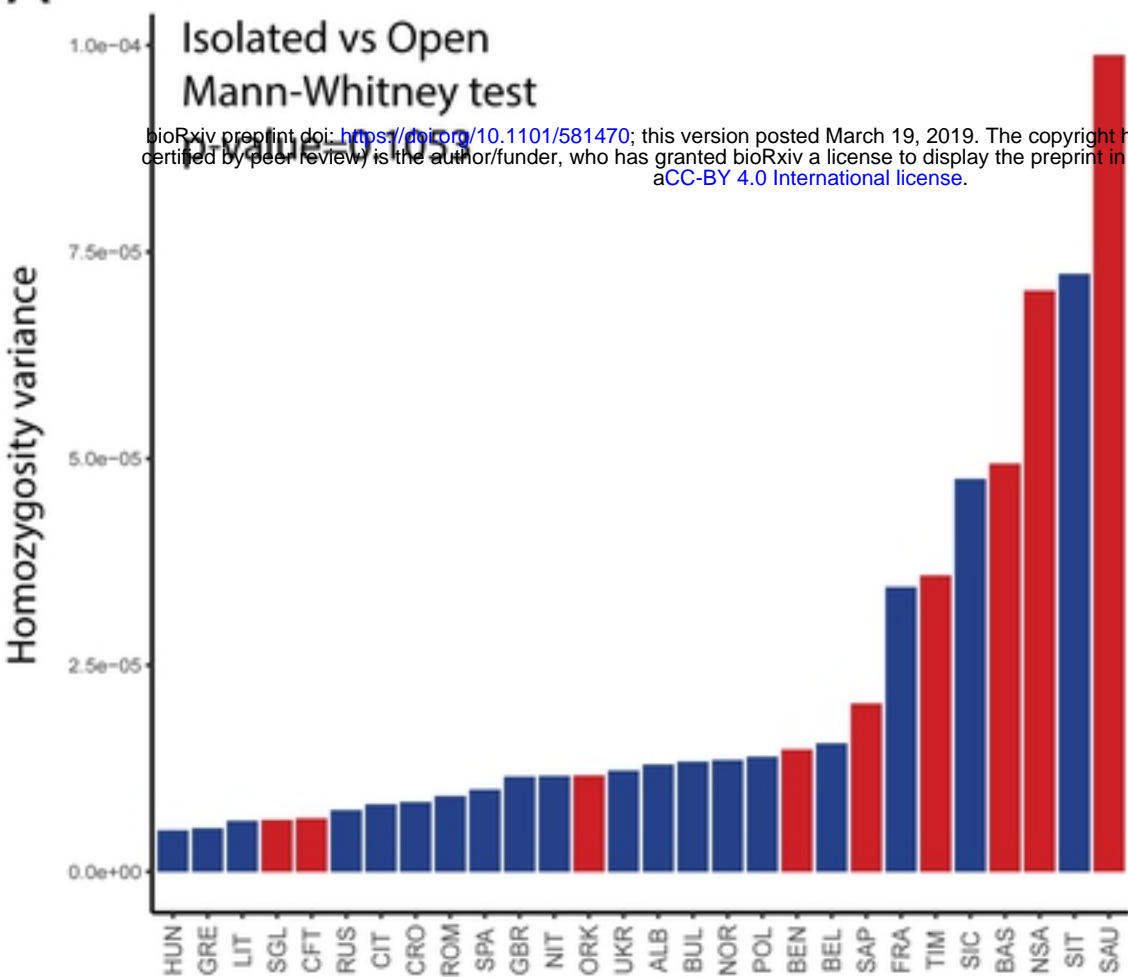

B

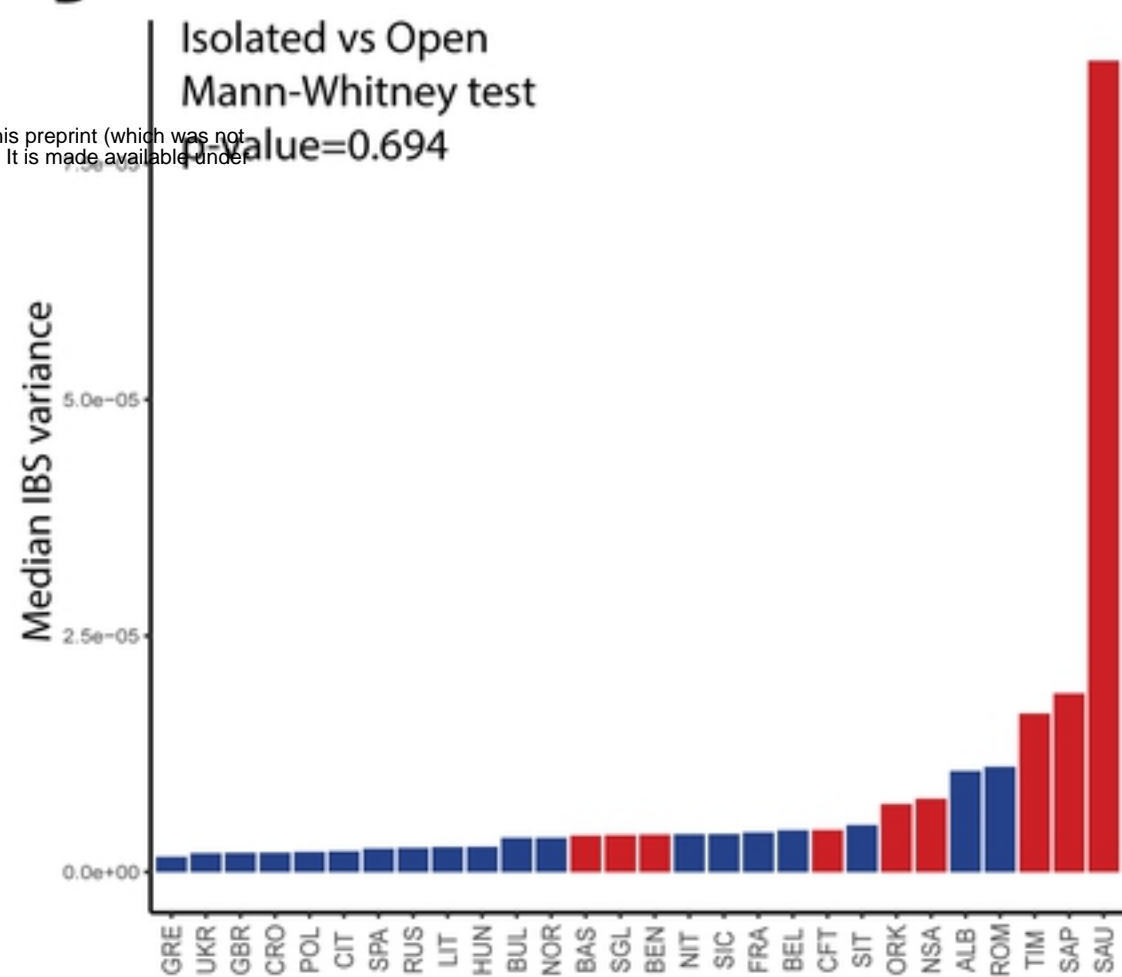

C

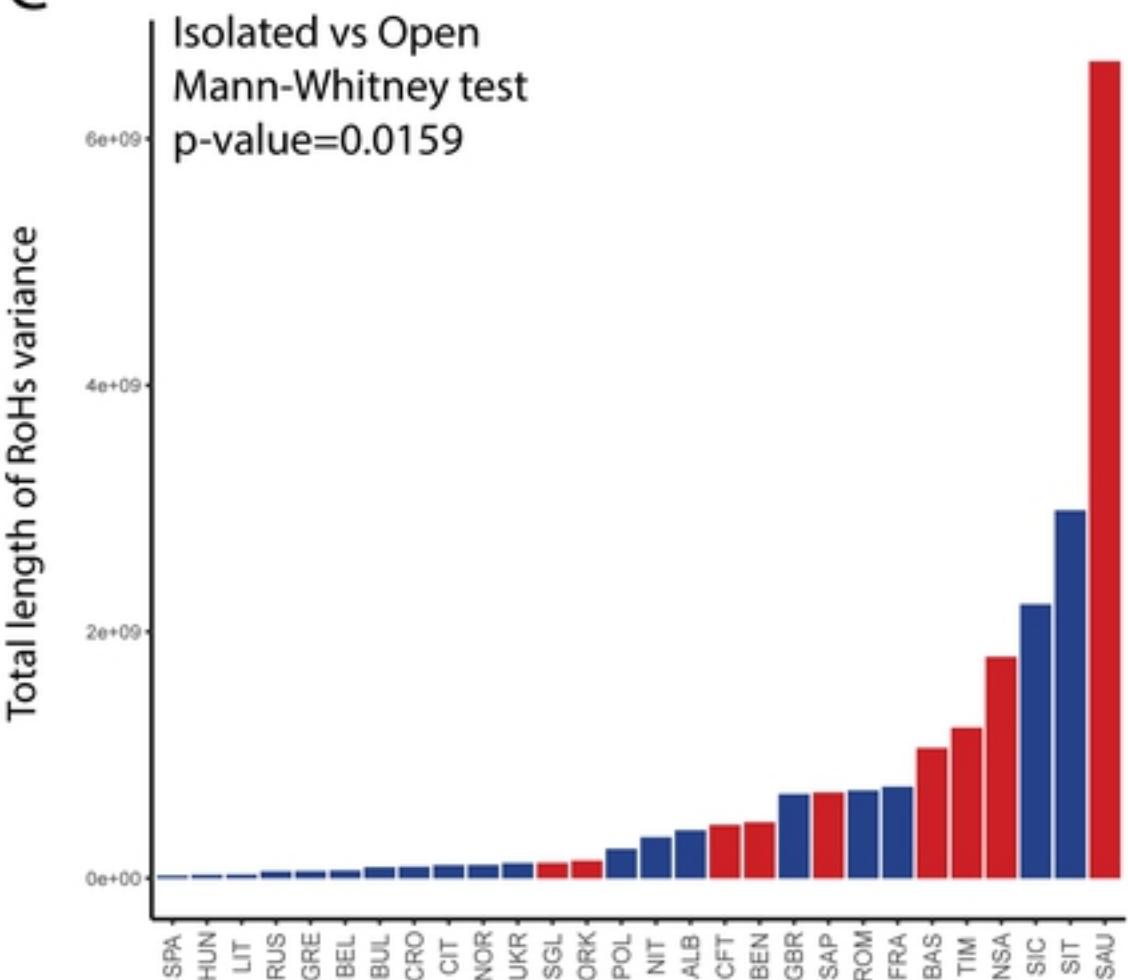

D

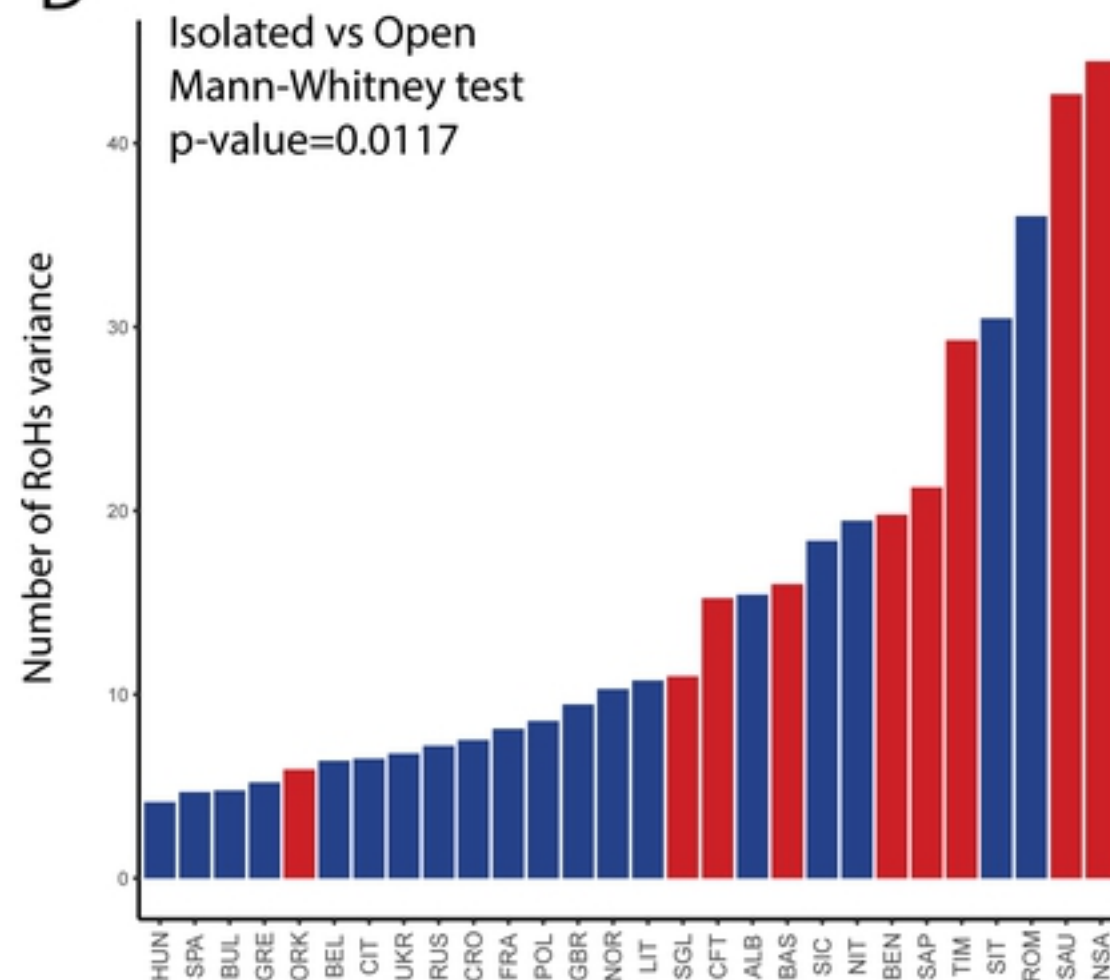

Fig. 1

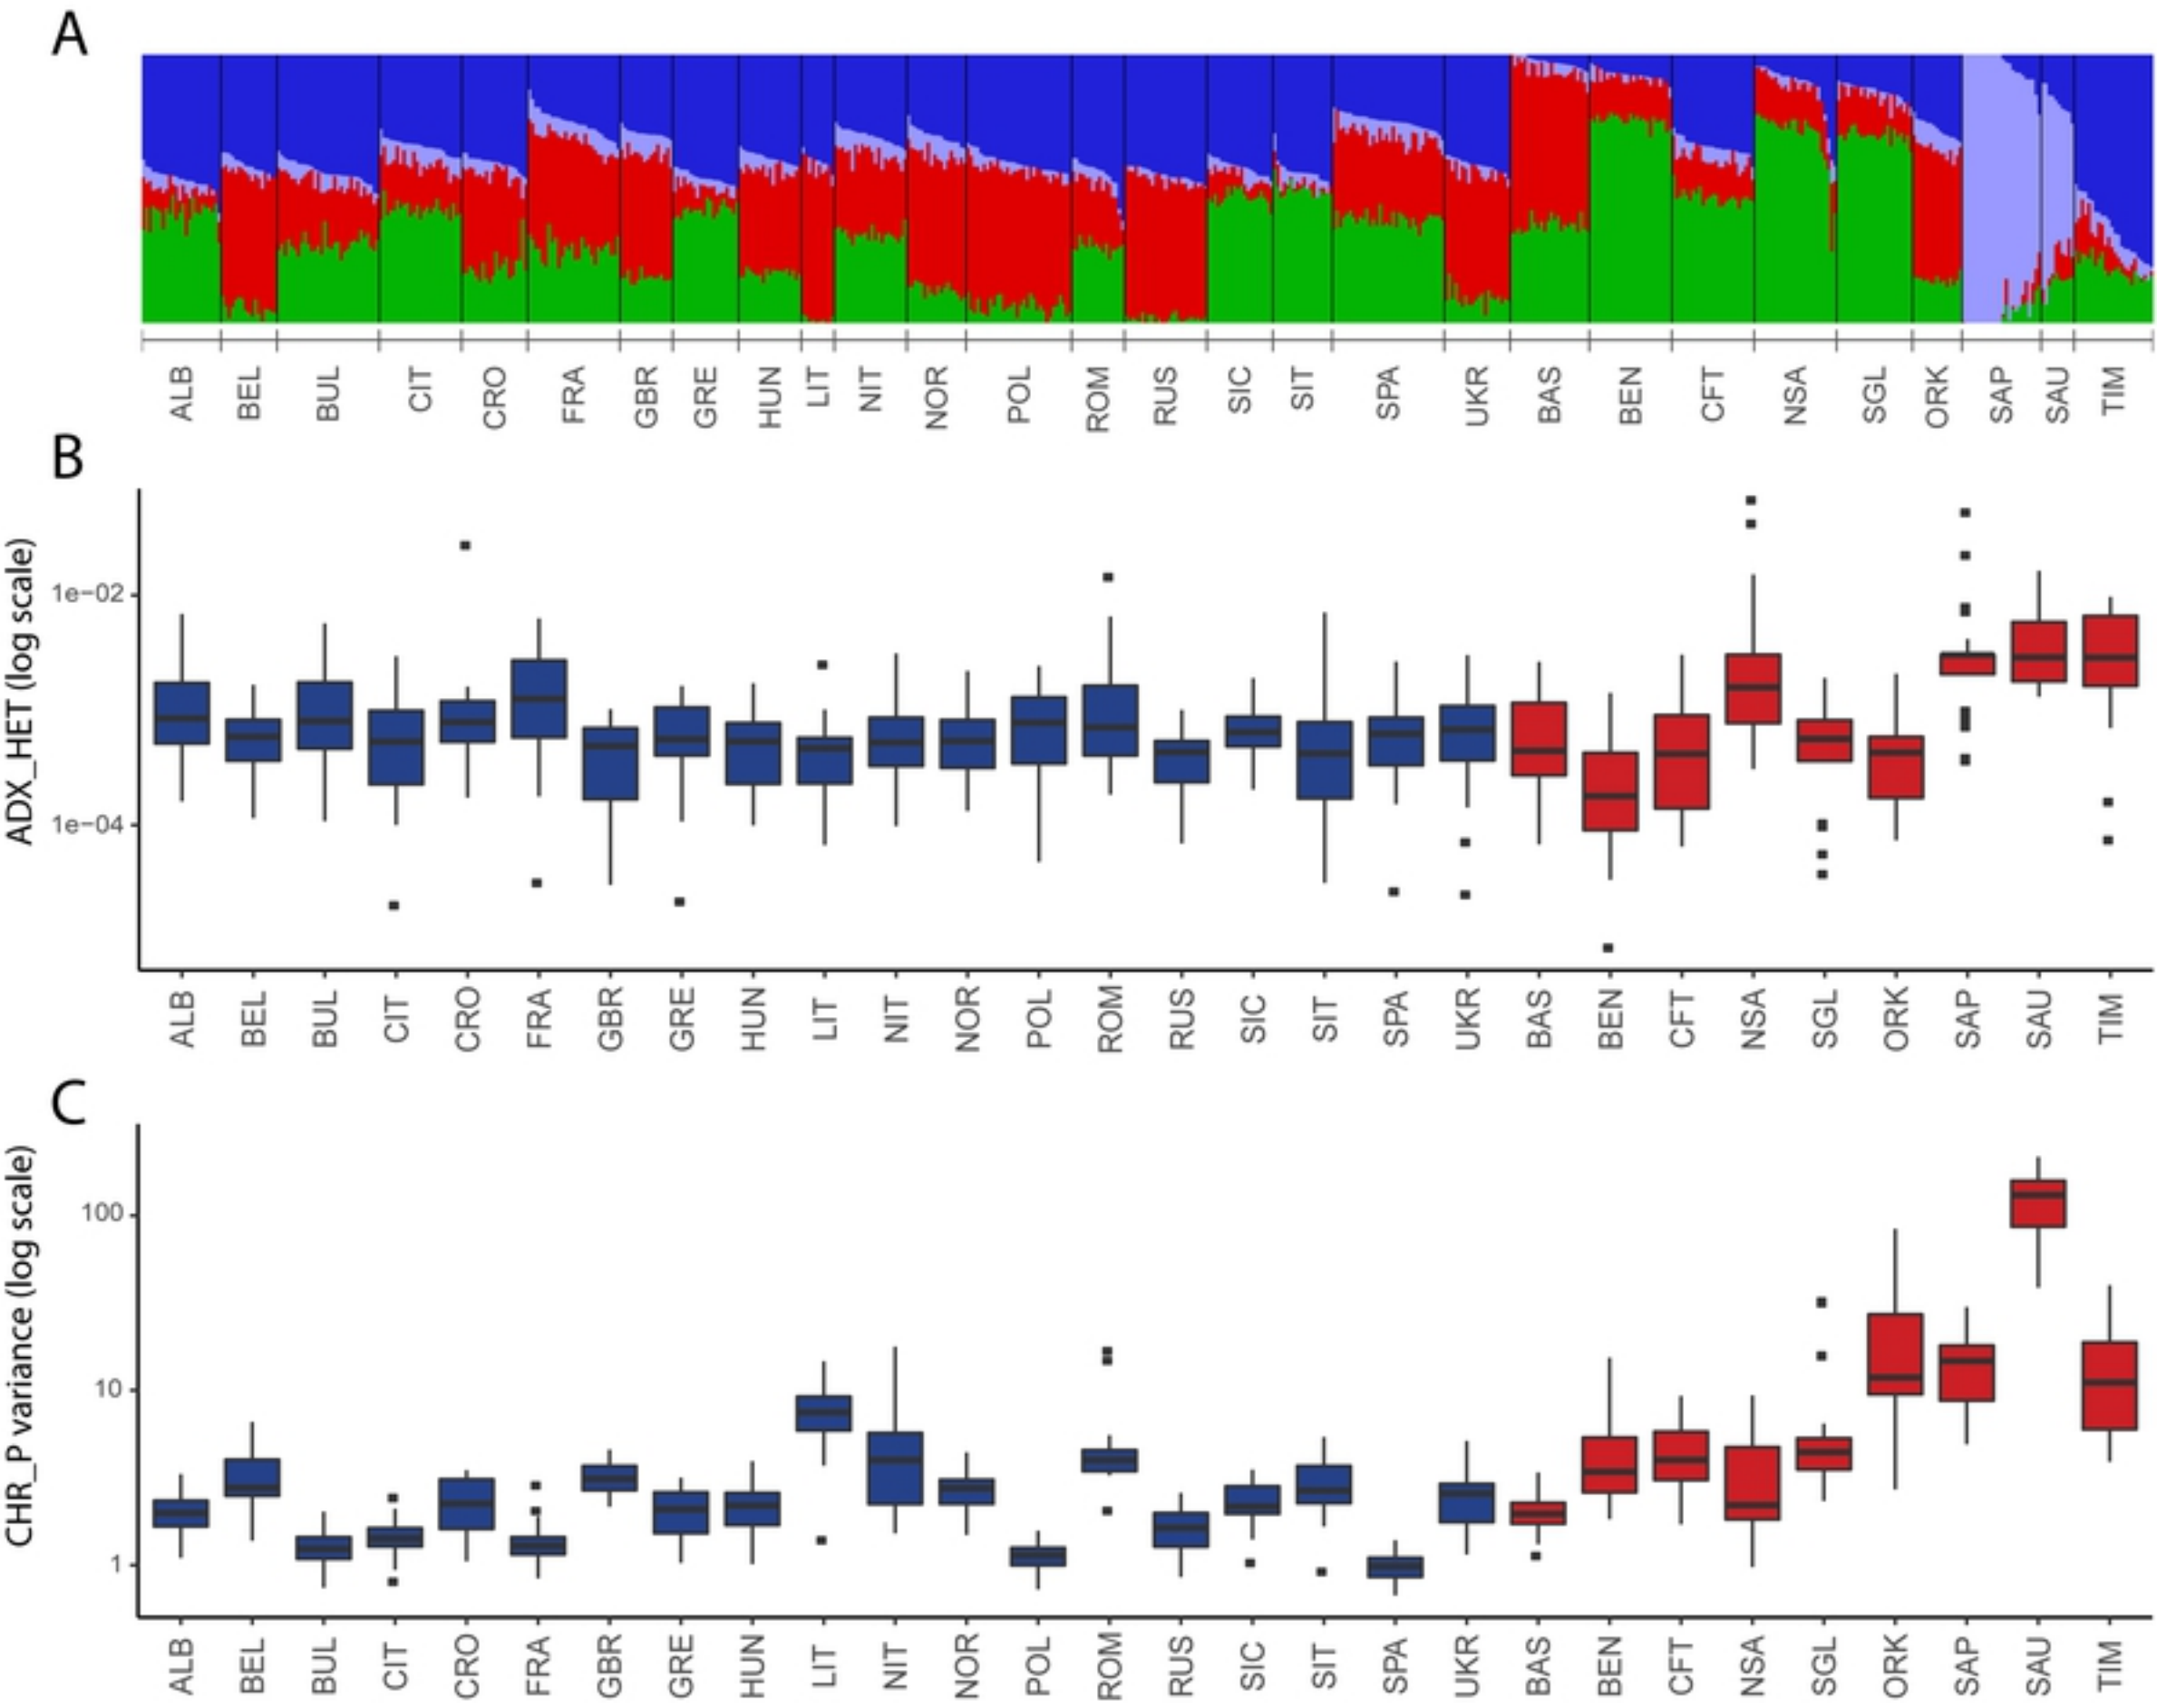

Fig. 2

bioRxiv preprint doi: <https://doi.org/10.1101/581470>; this version posted March 19, 2019. The copyright holder for this preprint (which was not certified by peer review) is the author/funder, who has granted bioRxiv a license to display the preprint in perpetuity. It is made available under aCC-BY 4.0 International license.

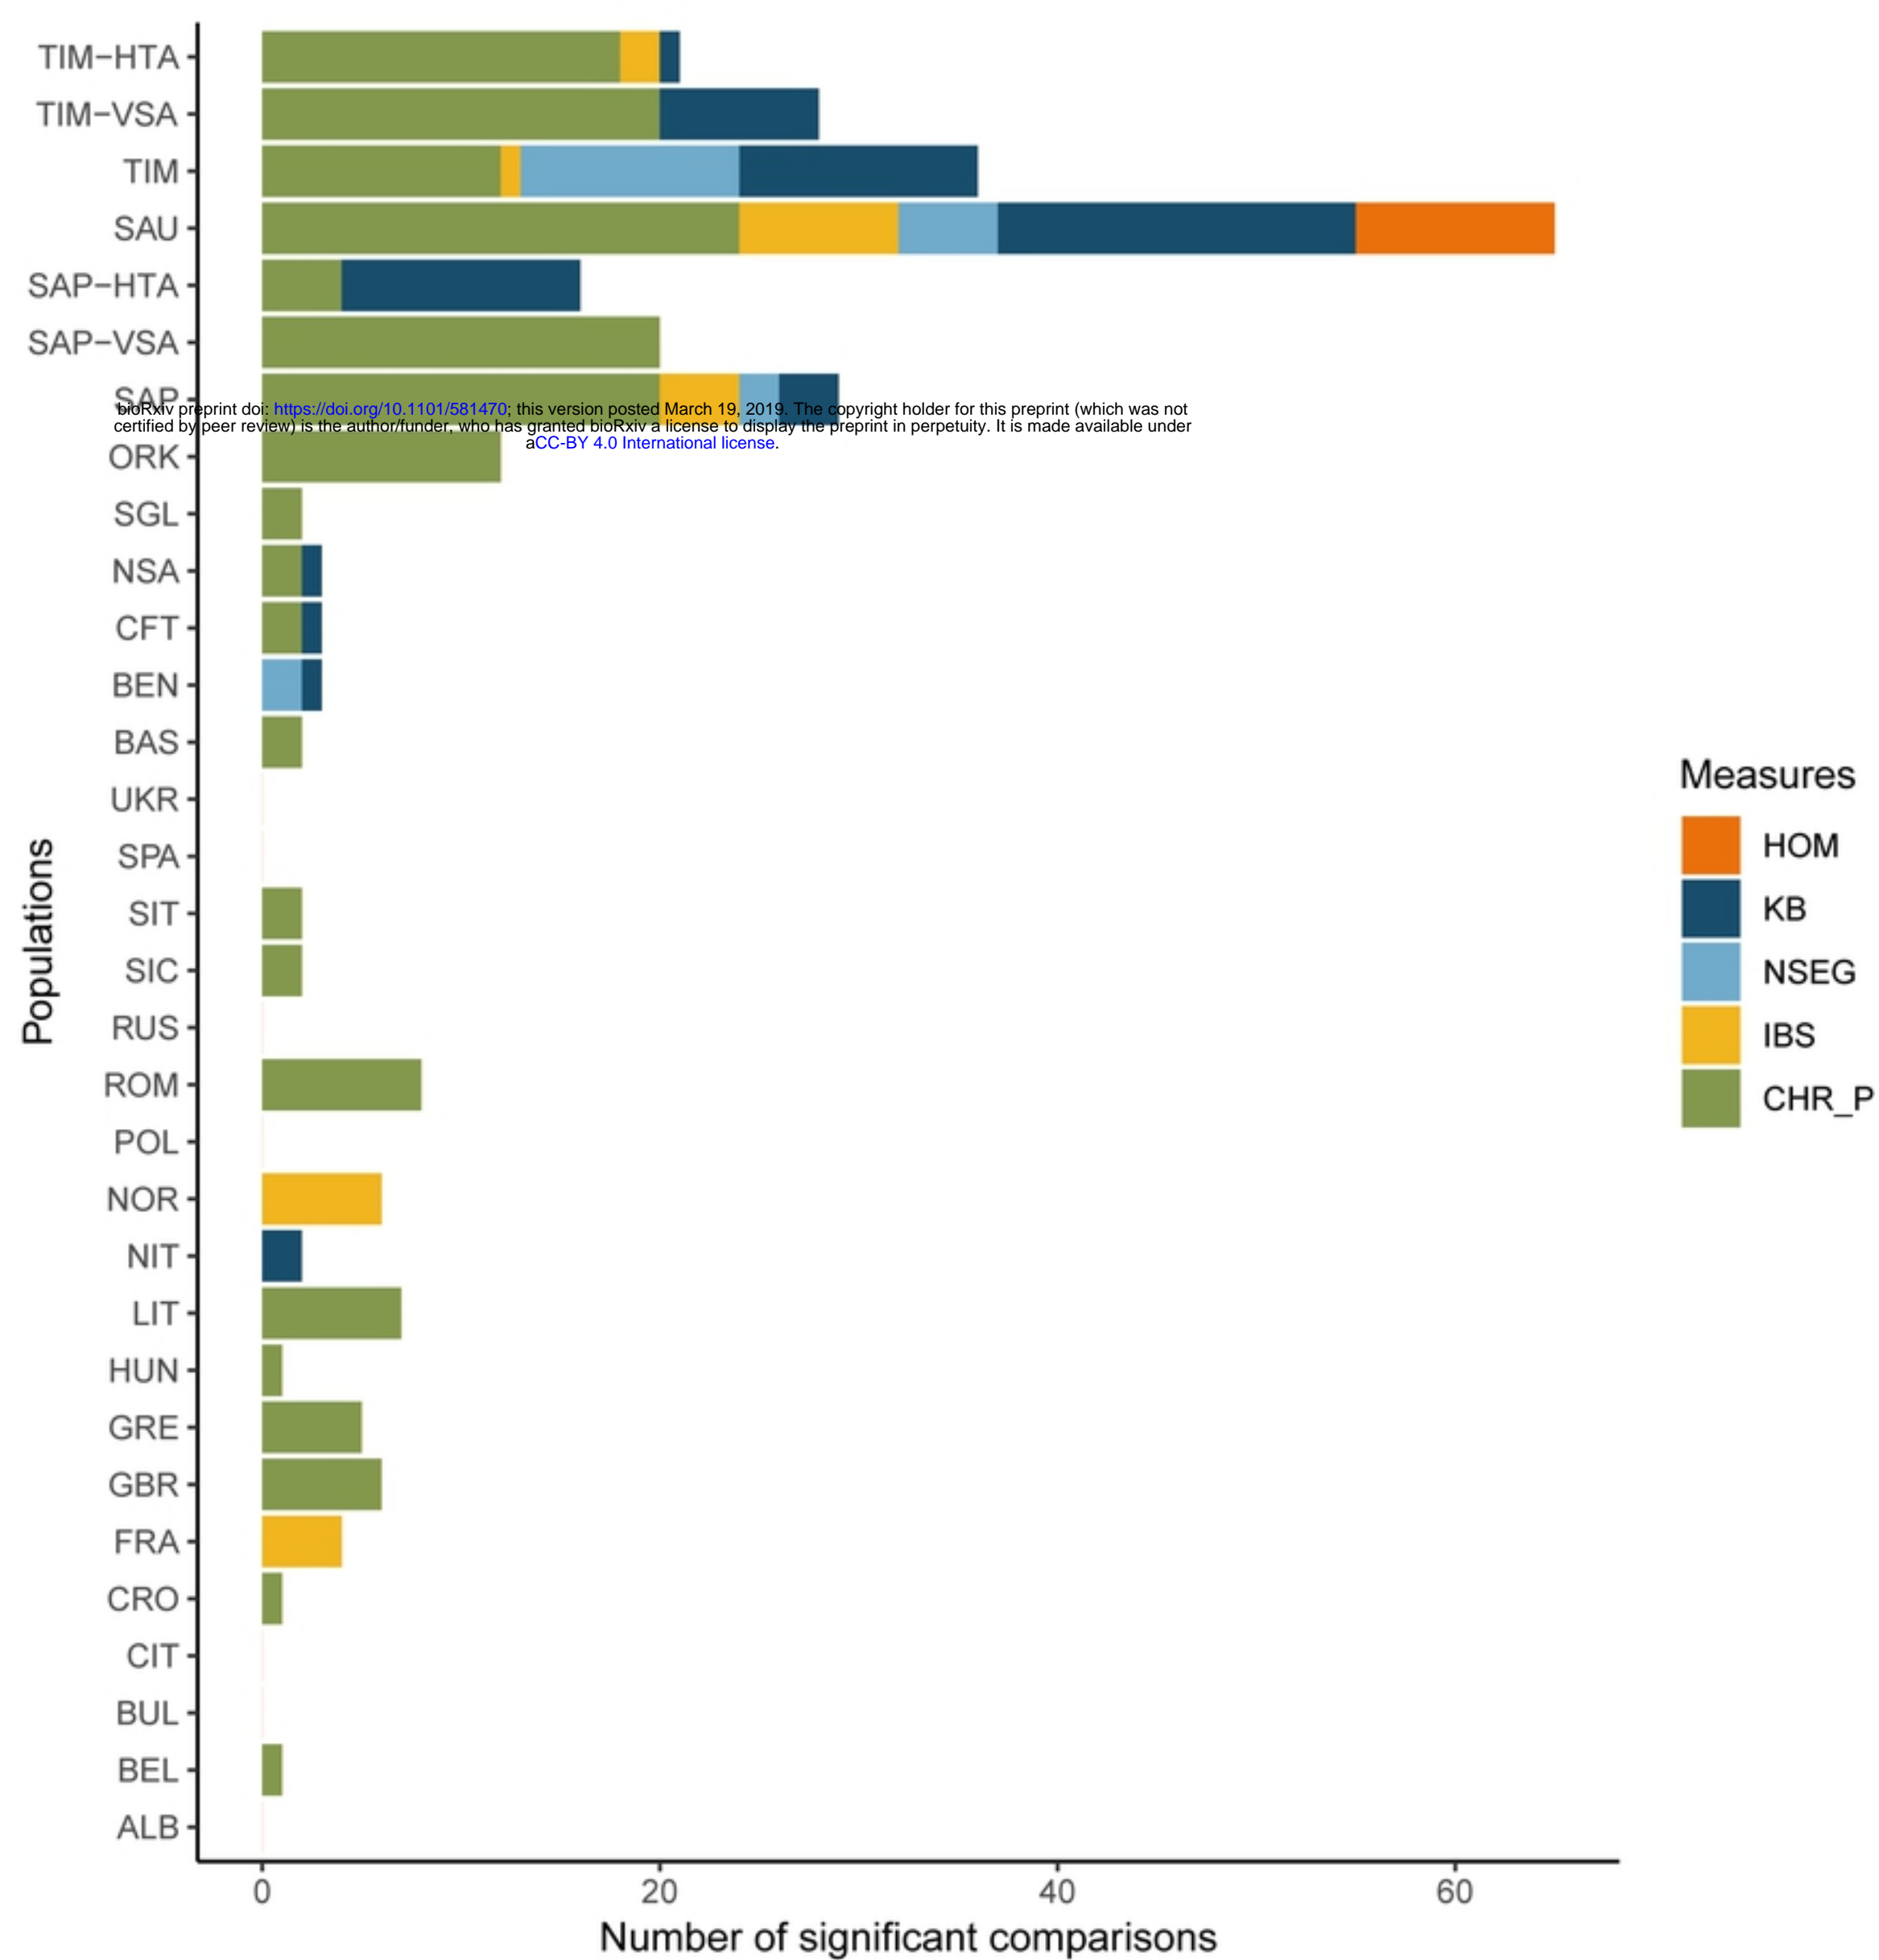

Fig. 3
